# Supplementary material
Source: PubMed Central journal article supplement (PMC4795037)
Supplement: rspb20152832supp1.pdf [file rspb20152832supp1.pdf]

***In vitro* force-length data**

| FrogID      | Max activation |         | ~65% activation |         | ~40% activation |         | ~15% activation |         |
|-------------|----------------|---------|-----------------|---------|-----------------|---------|-----------------|---------|
|             | P0 (N)         | L0 (mm) | P0 (N)          | L0 (mm) | P0 (N)          | L0 (mm) | P0 (N)          | L0 (mm) |
| 20150128    | 1.90493        | 8.52237 | 1.09886         | 11.5991 | 0.7477          | 10.8967 |                 |         |
| 20150223    | 8.9879         | 13.0805 | 6.70894         | 13.544  | 3.5642          | 14.4344 |                 |         |
| 20150224    | 13.9846        | 11.2047 |                 |         | 6.7997          | 13.4049 |                 |         |
| 20150303L   | 20.2254        | 11.4651 | 17.169          | 13.8495 | 8.6064          | 17.2082 |                 |         |
| 20150504R   | 10.2995        | 4.34055 |                 |         | 3.6647          | 5.46686 |                 |         |
| 20150504L   | 10.3291        | 4.34027 |                 |         | 0.3548          | 1.25957 | 3.66465         | 5.46686 |
| 20150505R   | 7.55096        | 5.79784 |                 |         |                 |         | 1.23791         | 6.96305 |
| 20150505L   | 8.56163        | 2.31231 | 5.46409         | 2.91453 | 3.2568          | 2.97545 | 2.22868         | 2.97957 |
| 20150505_2R | 15.0066        | 2.53518 |                 |         |                 |         |                 |         |
| 20150505_2L | 13.9036        | 3.26109 | 8.09375         | 4.29798 |                 |         | 2.50363         | 5.0236  |
| 20150610    | 9.1672         | 4.5145  | 5.80719         | 5.22038 |                 |         |                 |         |

Peak force (P0) and optimum length (L0) data for each individual binned by activation level

***In vitro* force-velocity data**

| Max activation |            |         | ~65% activation |            |          | ~40% activation |            |         | ~15% activation |            |          |
|----------------|------------|---------|-----------------|------------|----------|-----------------|------------|---------|-----------------|------------|----------|
| FrogID         | V (mm/sec) | F (N)   | FrogID          | V (mm/sec) | F (N)    | FrogID          | V (mm/sec) | F (N)   | FrogID          | V (mm/sec) | F (N)    |
| 20150223       | 48.6883    | 0.71007 | 20150223        | 29.0414    | 0.741184 | 20150327        | 12.6118    | 2.07548 | 20150401        | 16.1398    | 0.163361 |
| 20150223       | 27.0895    | 2.14666 | 20150223        | 18.8318    | 1.31131  | 20150327        | 22.7569    | 0.70611 | 20150401        | 8.67391    | 0.557128 |
| 20150223       | 14.0917    | 3.55331 | 20150223        | 7.85017    | 2.14661  | 20150327        | 4.78301    | 3.29431 | 20150401        | 4.5979     | 0.916746 |
| 20150223       | 6.92792    | 4.95848 | 20150223        | 5.40504    | 3.49428  | 20150327        | 3.13148    | 3.71539 | 20150401        | 1.84903    | 1.30554  |
| 20150223       | 2.89555    | 6.33215 | 20150223        | 1.13678    | 4.46086  | 20150327        | 1.69439    | 4.11205 | 20150401        | 1.78328    | 1.29942  |
| 20150326L      | 44.1381    | 1.02567 | 20150326L       | 34.6137    | 0.691843 | 20150401        | 29.3664    | 0.57851 | 20150406L       | 14.7597    | 0.101244 |
| 20150326L      | 5.0869     | 7.11281 | 20150326L       | 18.63      | 1.91604  | 20150401        | 15.6509    | 1.88235 | 20150406L       | 7.87292    | 0.309952 |
| 20150326L      | 23.421     | 2.93999 | 20150326L       | 10.1491    | 3.16432  | 20150401        | 10.1696    | 2.72219 | 20150406L       | 7.14154    | 0.47377  |
| 20150326L      | 13.05      | 4.53434 | 20150326L       | 4.84033    | 4.26194  | 20150401        | 4.21576    | 4.24983 | 20150406L       | 5.60474    | 0.640584 |
| 20150326L      | 1.83258    | 8.31586 | 20150326L       | 2.35853    | 5.05284  | 20150401        | 2.075      | 5.71553 | 20150407L       | 17.6736    | 0.556951 |
| 20150327       | 13.8557    | 5.63751 | 20150401        | 17.7012    | 3.14779  | 20150406L       | 17.1512    | 0.90128 | 20150407L       | 1.60866    | 3.16982  |
| 20150327       | 41.696     | 1.1223  | 20150401        | 10.5763    | 5.13287  | 20150406L       | 28.3524    | 0.3162  | 20150407L       | 10.2525    | 1.22411  |
| 20150327       | 2.23064    | 9.40018 | 20150401        | 5.36628    | 7.19146  | 20150407L       | 2.83127    | 8.69787 | 20150407L       | 5.64098    | 2.01606  |
| 20150327       | 21.7059    | 2.88988 | 20150401        | 2.14896    | 8.46439  | 20150407L       | 11.4964    | 5.13897 | 20150407L       | 1.09386    | 2.73874  |
| 20150327       | 4.43988    | 7.08615 | 20150406L       | 15.3678    | 2.71451  | 20150407L       | 28.8269    | 1.05491 |                 |            |          |
| 20150401       | 47.0152    | 1.70831 | 20150406L       | 7.93052    | 4.40626  | 20150407L       | 16.9658    | 2.96687 |                 |            |          |
| 20150401       | 22.0902    | 5.08852 | 20150406L       | 40.0303    | 0.526096 | 20150407L       | 5.08337    | 6.26869 |                 |            |          |
| 20150401       | 10.4165    | 8.49394 | 20150406L       | 10.5274    | 3.75656  |                 |            |         |                 |            |          |
| 20150401       | 3.6324     | 11.8436 | 20150406L       | 24.153     | 1.60847  |                 |            |         |                 |            |          |
| 20150401       | 2.44484    | 13.1679 | 20150407L       | 20.3118    | 4.10352  |                 |            |         |                 |            |          |
| 20150406L      | 8.64549    | 7.01229 | 20150407L       | 12.8263    | 6.51255  |                 |            |         |                 |            |          |
| 20150406L      | 32.0999    | 2.14709 | 20150407L       | 30.1782    | 1.2869   |                 |            |         |                 |            |          |
| 20150406L      | 21.137     | 3.69167 | 20150407L       | 6.84214    | 9.30495  |                 |            |         |                 |            |          |
| 20150406L      | 11.7519    | 5.48566 | 20150407L       | 3.66764    | 10.5013  |                 |            |         |                 |            |          |
| 20150406L      | 46.7938    | 0.76475 |                 |            |          |                 |            |         |                 |            |          |
| 20150407L      | 45.857     | 1.89514 |                 |            |          |                 |            |         |                 |            |          |
| 20150407L      | 16.1722    | 10.1125 |                 |            |          |                 |            |         |                 |            |          |
| 20150407L      | 3.23873    | 16.9325 |                 |            |          |                 |            |         |                 |            |          |
| 20150407L      | 26.3388    | 6.14448 |                 |            |          |                 |            |         |                 |            |          |
| 20150407L      | 7.42121    | 14.0847 |                 |            |          |                 |            |         |                 |            |          |

Force (F) and velocity (V) data for each individual binned by activation level

### ***In vivo* muscle length and velocity data**

| <b>Long hops</b> |                   |                  |                 |            |                          |                           |  |
|------------------|-------------------|------------------|-----------------|------------|--------------------------|---------------------------|--|
| <b>FrogID</b>    | <b>Linit (mm)</b> | <b>Lfin (mm)</b> | <b>V (mm/s)</b> | <b>EMG</b> | <b>Hop distance (mm)</b> | <b>Take off time (ms)</b> |  |
| 12/1/2011        | 10.329            | 8.13             | 11.24           | 0.045      | 408                      | 181                       |  |
| 12/1/2011        | 10.48             | 8.5              | 11.9            | 0.035      | 412                      | 197                       |  |
| 12/1/2011        | 10.18             | 7.95             | 14.9            | 0.033      | 412                      | 161                       |  |
| 12/1/2011        | 10.37             | 7.36             | 10.97           | 0.079      | 424                      | 327                       |  |
| 12/1/2011        | 10.27             | 7.63             | 12.99           | 0.045      | 428                      | 210                       |  |
| 12/8/2011        | 6.35              | 5.61             | 7.41            | 0.031      | 306                      | 121                       |  |
| 12/8/2011        | 6.53              | 5.68             | 4.58            | 0.046      | 310                      | 199                       |  |
| 12/8/2011        | 6.62              | 5.51             | 7.29            | 0.044      | 328                      | 158                       |  |
| 12/8/2011        | 6.51              | 5.29             | 6.85            | 0.057      | 337                      | 179                       |  |
| 12/8/2011        | 6.53              | 5.32             | 8.73            | 0.052      | 354                      | 165                       |  |
| 2/7/2012         | 7.71              | 5.59             | 8.37            | 0.011      | 337                      | 304                       |  |
| 2/7/2012         | 7.52              | 5.55             | 13.87           | 0.011      | 341                      | 154                       |  |
| 2/7/2012         | 7.41              | 5.25             | 9.83            | 0.0185     | 379                      | 147                       |  |
| 2/7/2012         | 7.31              | 5.15             | 12.27           | 0.029      | 398                      | 177                       |  |
| 2/7/2012         | 7.58              | 5.36             | 10.4            | 0.027      | 411                      | 173                       |  |
| 3/21/2011        | 8.72              | 6.88             | 17.05           | 0.589      | 312                      | 112                       |  |
| 3/21/2011        | 8.57              | 6.66             | 16.66           | 0.785      | 321                      | 143                       |  |
| 3/21/2011        | 8.98              | 7.16             | 17.14           | 0.841      | 346                      | 128                       |  |
| 3/21/2011        | 8.815             | 7.11             | 18.43           | 0.631      | 351                      | 98                        |  |
| 3/21/2011        | 9.187             | 7.188            | 22.05           | 0.842      | 391                      | 133                       |  |

| <b>Mid hops</b> |                   |                  |                 |            |                          |                           |  |
|-----------------|-------------------|------------------|-----------------|------------|--------------------------|---------------------------|--|
| <b>FrogID</b>   | <b>Linit (mm)</b> | <b>Lfin (mm)</b> | <b>V (mm/s)</b> | <b>EMG</b> | <b>Hop distance (mm)</b> | <b>Take off time (ms)</b> |  |
| 12/1/2011       | 10.317            | 8.5              | 6.44            | 0.03       | 240                      | 281                       |  |
| 12/1/2011       | 10.2              | 8.99             | 10.7            | 0.021      | 243                      | 209                       |  |
| 12/1/2011       | 10.25             | 8.97             | 10.2            | 0.016      | 256                      | 154                       |  |
| 12/1/2011       | 10.32             | 8.98             | 5.97            | 0.031      | 261                      | 222                       |  |
| 12/1/2011       | 10.1              | 9.05             | 7.05            | 0.014      | 262                      | 185                       |  |
| 12/8/2011       | 6.54              | 6                | 3.63            | 0.029      | 210                      | 178                       |  |
| 12/8/2011       | 6.5               | 5.89             | 4.66            | 0.039      | 218                      | 166                       |  |
| 12/8/2011       | 6.5               | 5.9              | 5.02            | 0.024      | 228                      | 130                       |  |
| 12/8/2011       | 6.56              | 5.96             | 3.79            | 0.021      | 239                      | 197                       |  |
| 12/8/2011       | 6.43              | 5.79             | 4.95            | 0.032      | 260                      | 188                       |  |
| 2/7/2012        | 7.95              | 6.67             | 9.06            | 0.0086     | 208                      | 142                       |  |
| 2/7/2012        | 7.61              | 6.44             | 7.77            | 0.0068     | 253                      | 146                       |  |
| 2/7/2012        | 7.33              | 5.89             | 8.38            | 0.0124     | 265                      | 189                       |  |
| 2/7/2012        | 8.01              | 6.56             | 7.72            | 0.0057     | 269                      | 199                       |  |
| 2/7/2012        | 7.48              | 5.73             | 6.39            | 0.013      | 270                      | 295                       |  |
| 3/21/2011       | 8.64              | 7.75             | 6.91            | 0.437      | 194                      | 131                       |  |
| 3/21/2011       | 8.88              | 8.16             | 7.39            | 0.137      | 197                      | 99                        |  |
| 3/21/2011       | 8.67              | 7.24             | 18.29           | 0.295      | 201                      | 87                        |  |
| 3/21/2011       | 8.63              | 7.7              | 5.47            | 0.397      | 205                      | 212                       |  |
| 3/21/2011       | 8.57              | 7.53             | 6.81            | 0.44       | 218                      | 171                       |  |

| Short hops |            |           |          |        |                   |                    |
|------------|------------|-----------|----------|--------|-------------------|--------------------|
| FrogID     | Linit (mm) | Lfin (mm) | V (mm/s) | EMG    | Hop distance (mm) | Take off time (ms) |
| 12/1/2011  | 10.25      | 9.67      | 6.1      | 0.01   | 97                | 89                 |
| 12/1/2011  | 10.267     | 9.69      | 4.6      | 0.012  | 104               | 129                |
| 12/1/2011  | 10.34      | 9.37      | 7.6      | 0.017  | 107               | 147                |
| 12/1/2011  | 10.06      | 9.42      | 3.8      | 0.011  | 110               | 185                |
| 12/1/2011  | 10.38      | 9.29      | 7.5      | 0.025  | 127               | 215                |
| 12/8/2011  | 6.57       | 6.06      | 5.17     | 0.018  | 121               | 110                |
| 12/8/2011  | 6.55       | 6.21      | 1.96     | 0.0263 | 123               | 149                |
| 12/8/2011  | 6.43       | 6.14      | 1.31     | 0.015  | 142               | 217                |
| 12/8/2011  | 6.36       | 5.91      | 5.57     | 0.027  | 146               | 84                 |
| 12/8/2011  | 6.5        | 5.95      | 5.49     | 0.021  | 148               | 134                |
| 2/7/2012   | 7.31       | 6.83      | 2.37     | 0.007  | 93                | 261                |
| 2/7/2012   | 7.35       | 6.81      | 12.02    | 0.0065 | 117               | 83                 |
| 2/7/2012   | 6.97       | 6.54      | 2.32     | 0.0037 | 127               | 202                |
| 2/7/2012   | 7.89       | 7.27      | 5.35     | 0.0049 | 137               | 135                |
| 2/7/2012   | 7.86       | 7.24      | 3.8      | 0.0065 | 141               | 182                |
| 3/21/2011  | 8.6        | 8.24      | 1.17     | 0.19   | 106               | 313                |
| 3/21/2011  | 8.7        | 8.31      | 4.34     | 0.185  | 137               | 116                |
| 3/21/2011  | 8.97       | 8.26      | 8.8      | 0.25   | 148               | 97                 |
| 3/21/2011  | 8.64       | 8.09      | 3.31     | 0.25   | 151               | 172                |
| 3/21/2011  | 8.45       | 7.6       | 8.76     | 0.223  | 162               | 110                |

Initial length (Linit), final length (Lfin) velocity (V), normalized integrated EMG (EMG) and hop parameters binned by hop distance.
